# Supplementary material
Source: Royal Society of Chemistry journal article supplement (doi:10.1039/d6gc00844e)
Supplement: d6gc00844e1.pdf [file d6gc00844e1.pdf]

## **CuMoRu ternary nanorods: synergy effect of metal elements enables efficient electrochemical CO<sub>2</sub> reduction towards selective ethanol production**

Dong Xiang\*<sup>a, b, c</sup>, Huanzong Liao<sup>a</sup>, Ziyi Gui<sup>c</sup>, Dezhong Hu<sup>c</sup>, Kunzhen Li,<sup>c</sup> Kanghua Miao,<sup>c</sup> Aidar Kuchkaev<sup>d</sup>, Dmitry G. Yakhvarov<sup>d</sup>, Xiongwu Kang\*<sup>c</sup>, Xiufang Wang\*<sup>a</sup>

---

a School of Pharmacy, Guangdong Pharmaceutical University, Guangzhou 510006, Guangdong, China

b College of Chemistry, Bohai University, Jinzhou, 121013, China

c New Energy Research Institute, School of Environment and Energy, South China University of Technology, 382 East Waihuan Road, Higher Education Mega Center, Guangzhou 510006, China

d Arbuzov Institute of Organic and Physical Chemistry, FRC Kazan Scientific Center of RAS, Arbuzov Street 8, Kazan 420088, Russian Federation

\*Email: xiangdong@bhu.edu.cn (D. Xiang), esxkang@scut.edu.cn (X. Kang), xiufang Wang: x\_f\_wang@163.com

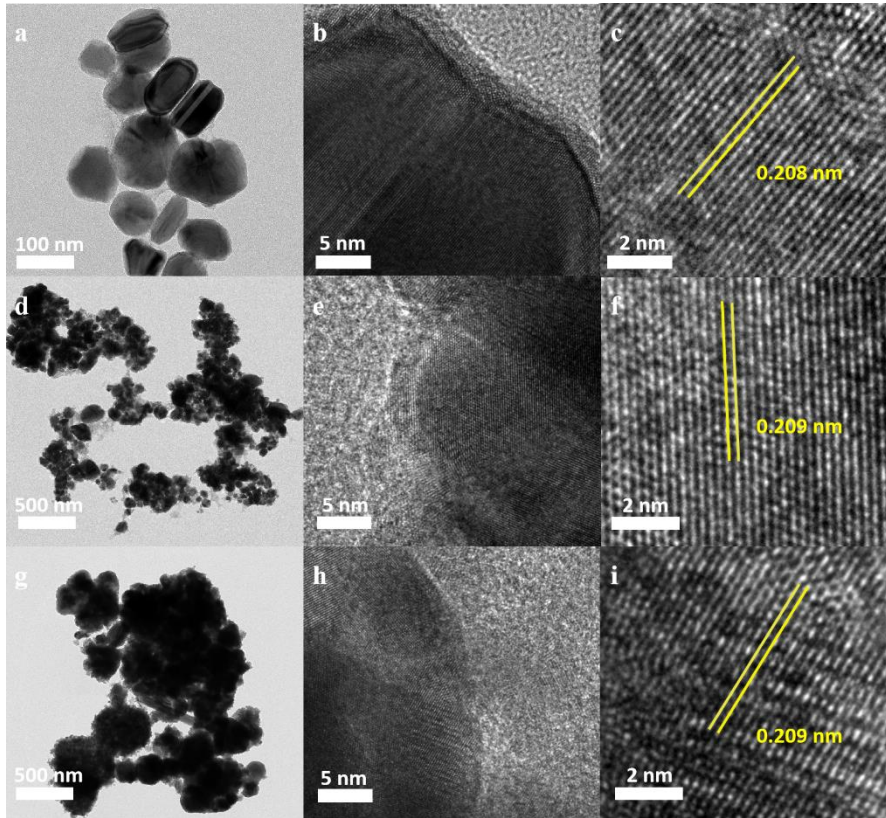

**Figure S1.** TEM and HRTEM images of (a-c) Cu, (d-e) CuRu and (g-i) CuMo.

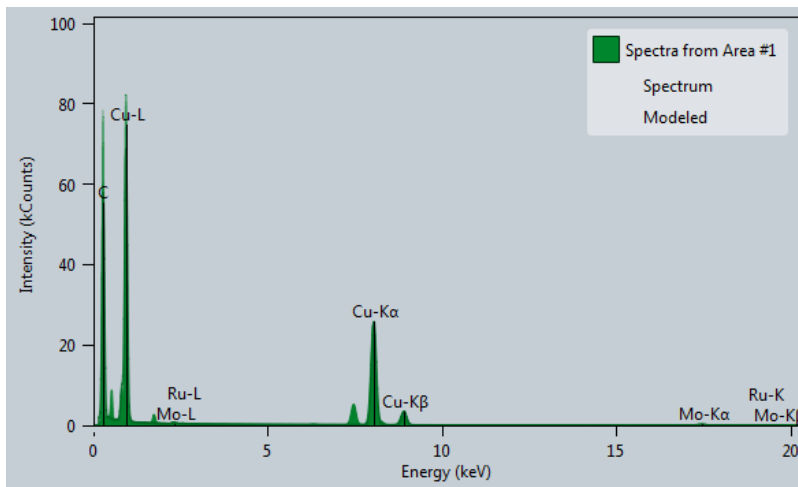

**Figure S2.** EDS spectrum of CuMoRu obtained in TEM characterization.

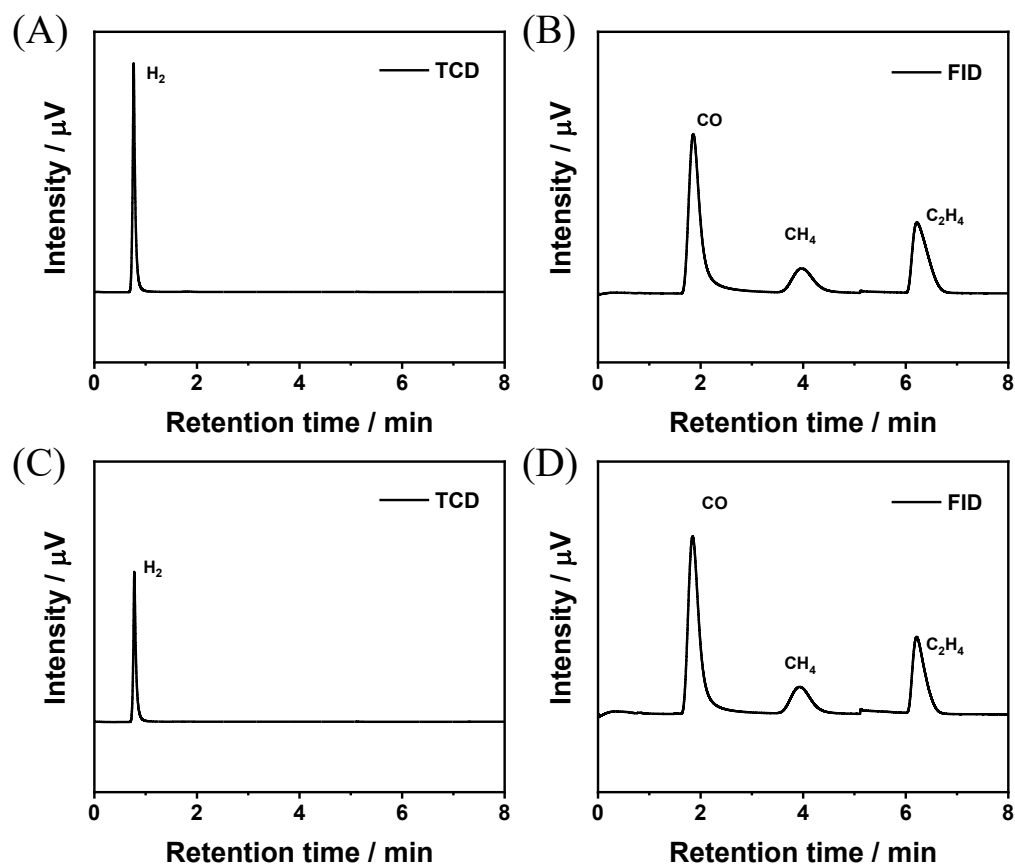

**Figure S3.** Gas chromatography plots for determining gas products of  $\text{eCO}_2\text{RR}$  on (A-B) Cu and (C-D) CuMo at  $-1.1\text{ V vs. RHE}$  in  $1.0\text{ M KOH}$  aqueous electrolyte.

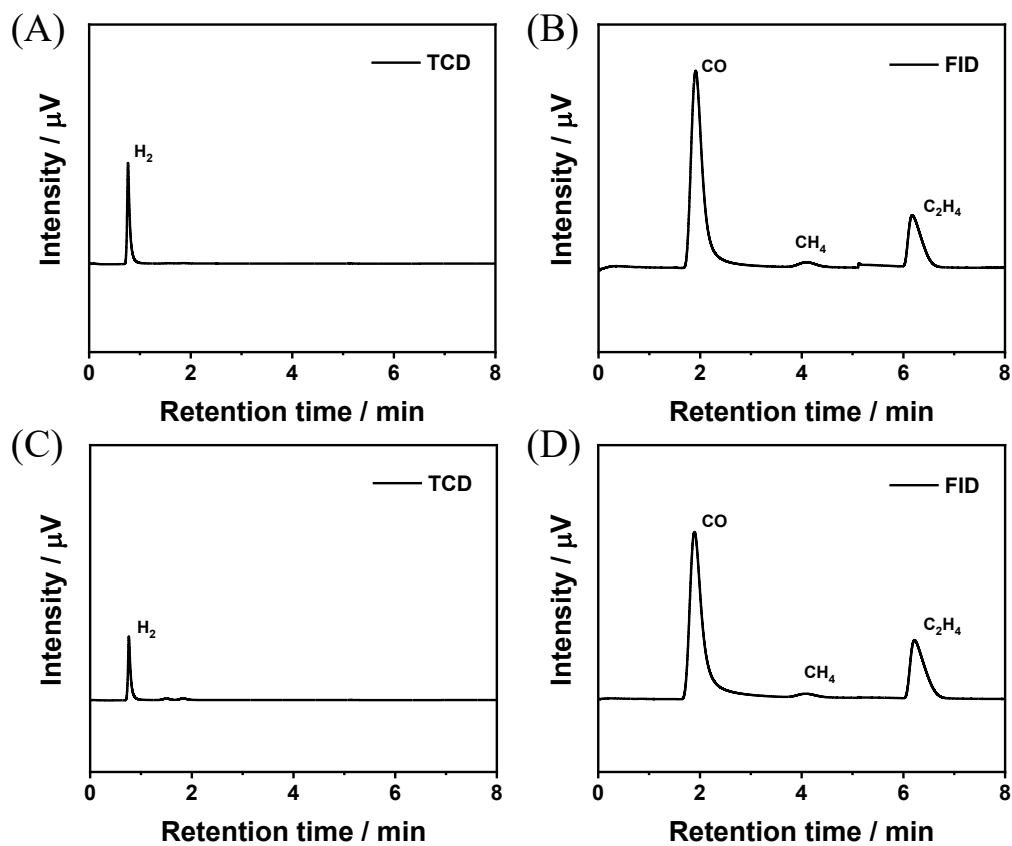

**Figure S4.** Gas chromatography plots for determining gas products of eCO<sub>2</sub>RR on (A-B) CuRu and (C-D) CuMoRu at  $-1.1$  V vs. RHE in  $1.0$  M KOH electrolyte.

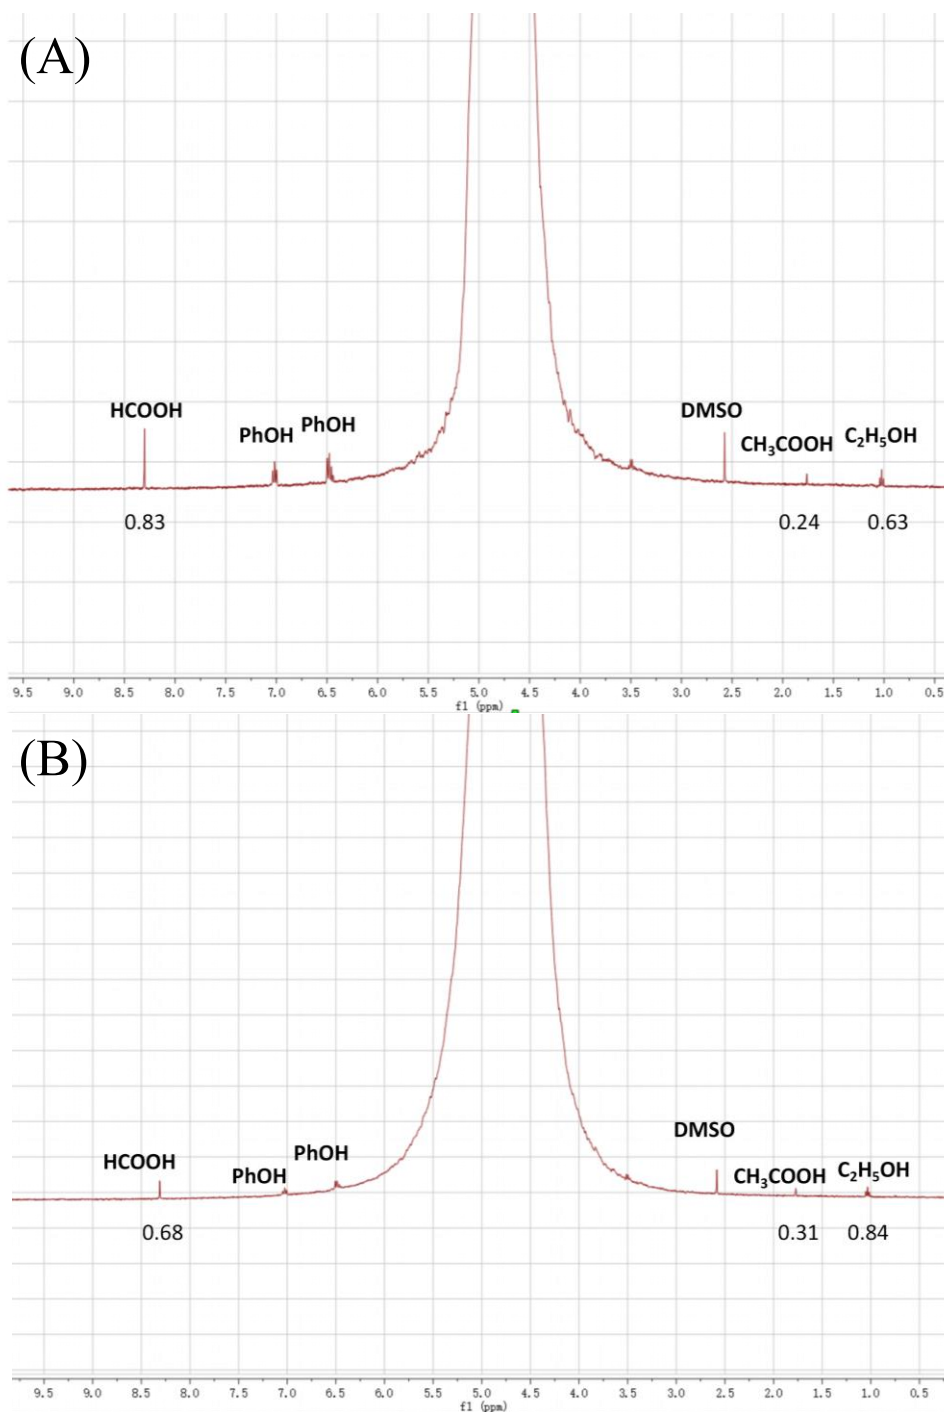

**Figure S5.**  $^1\text{H-NMR}$  spectrum and the corresponding the integral values for liquid products of (A) Cu and (B) CuMo catalysts at  $-1.1$  V vs. RHE in  $1.0$  M KOH electrolyte, with dimethyl sulfoxide (DMSO) and phenol (PhOH) as an internal standard.

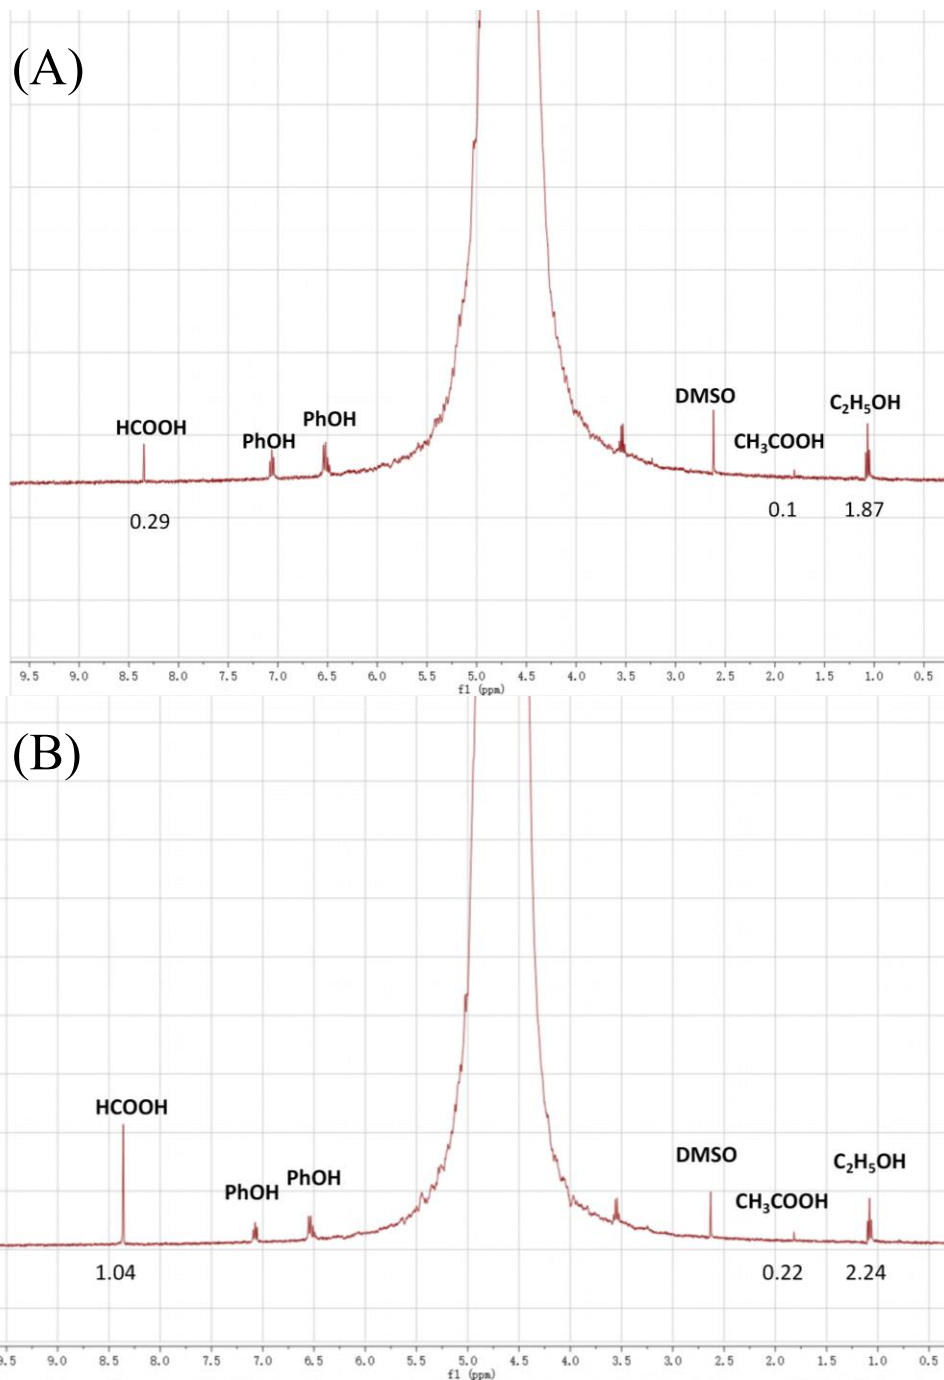

**Figure S6.**  $^1\text{H-NMR}$  spectrum and the corresponding the integral values for liquid products of (A) CuRu and (B) CuMoRu catalysts at  $-1.1$  V vs. RHE in  $1.0$  M KOH electrolyte, with dimethyl sulfoxide (DMSO) and phenol (PhOH) as an internal standard.

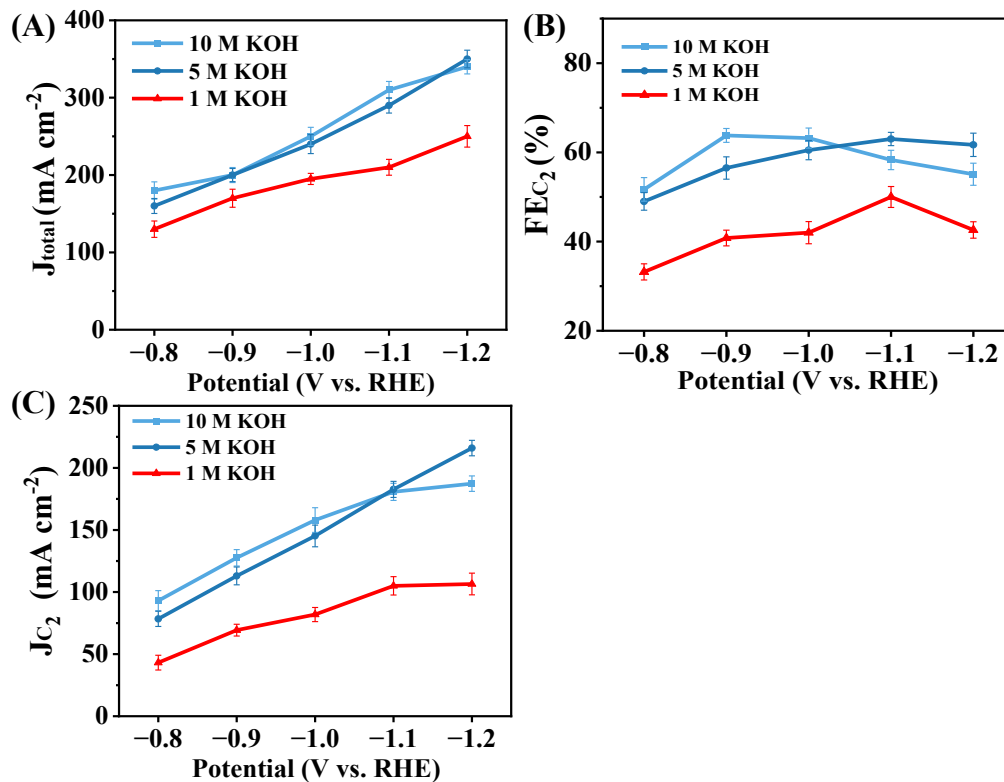

**Figure S7.** (A) Total current density, FE of C<sub>2</sub> products and (C) partial current density of eCO<sub>2</sub>RR on CuMoRu in 1.0 M, 5.0 M, and 10.0 M KOH electrolyte.

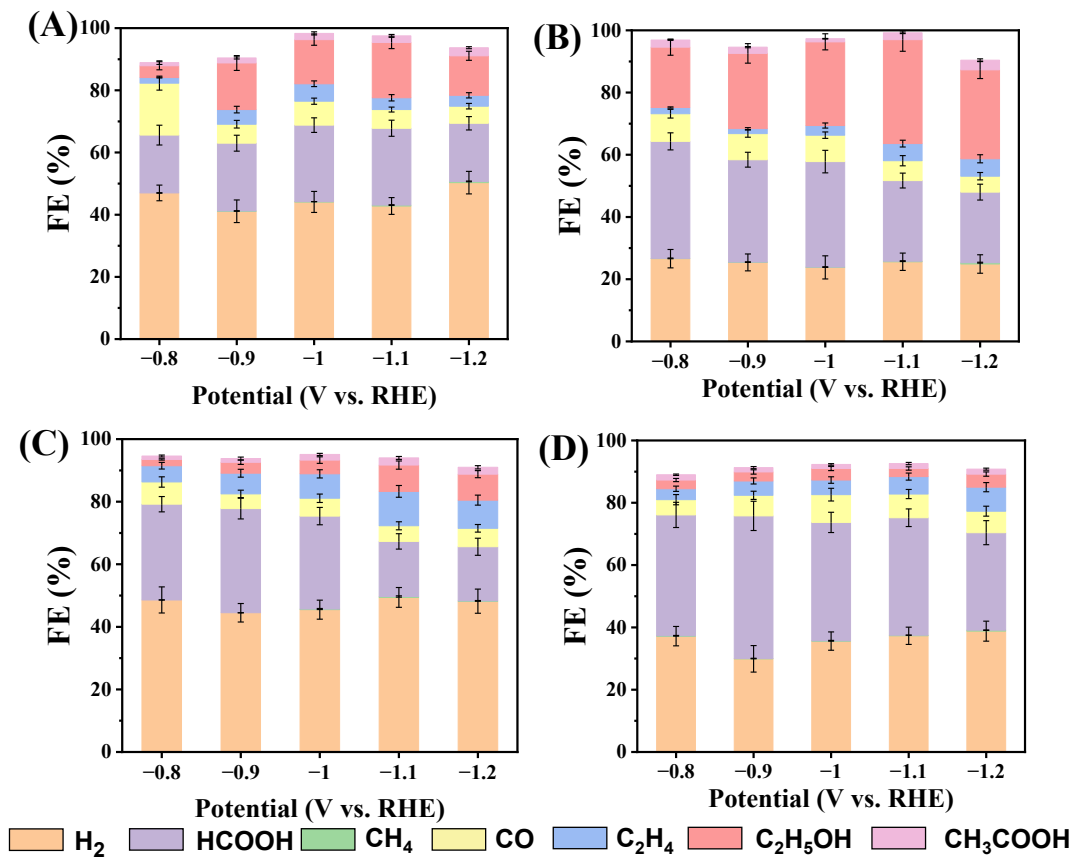

**Figure S8.** FE of eCO<sub>2</sub>RR products on (A) CuMoRu-5, (B) CuMoRu-3, (C) CuMoRu-2 and (D) CuMoRu-1 in 1.0 M KOH electrolyte.

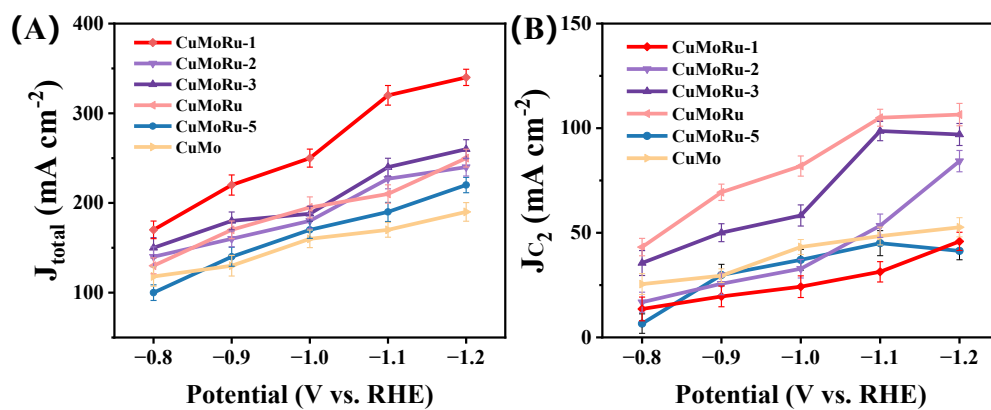

**Figure S9.** (a) Total current density and (b) partial current density of  $\text{C}_2$  products of CuMo, CuMoRu and CuMoRu-X (X=1, 2, 3, 5).

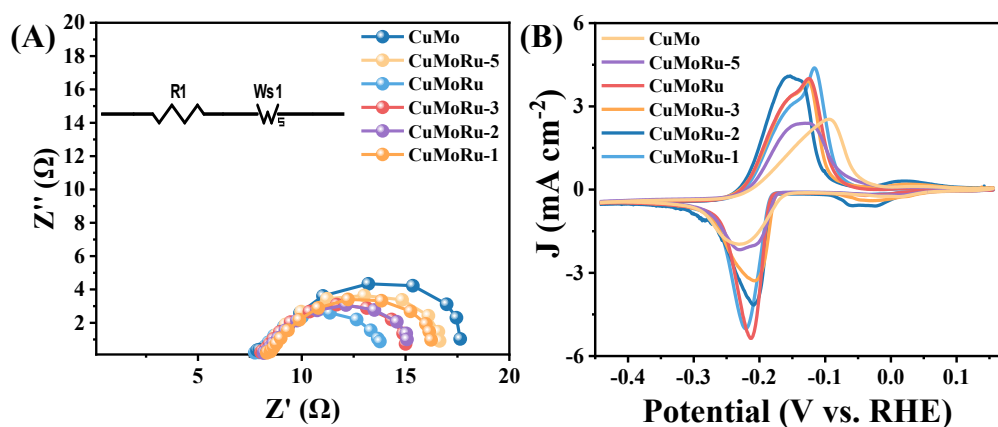

**Figure S10.** (a) Nyquist plots of EIS spectra of  $\text{eCO}_2\text{RR}$  on CuMo, CuMoRu and CuMoRu-X (X=1, 2, 3, 5). (b) Cyclic voltammetry of Pb underpotential deposition of CuMo and CuMoRu-X samples.

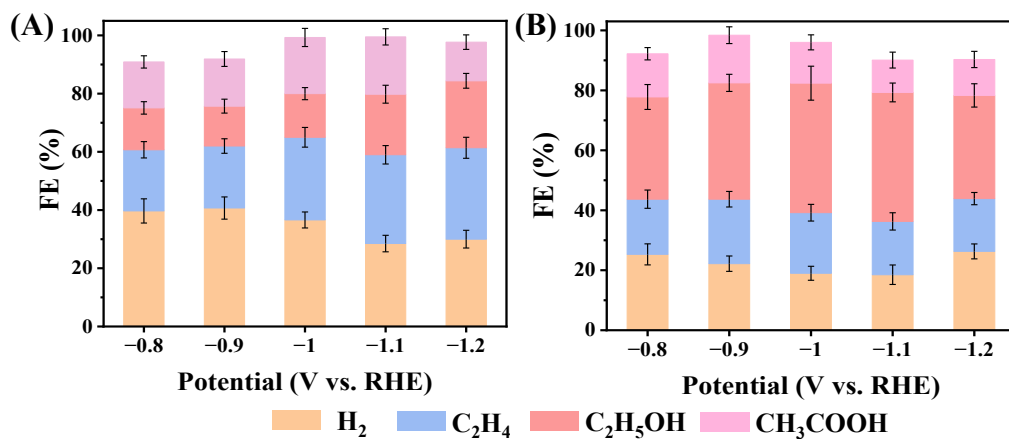

**Figure S11.** The FEs of CuMo and CuMoRu in 1.0 M KOH for CORR in flow cell.

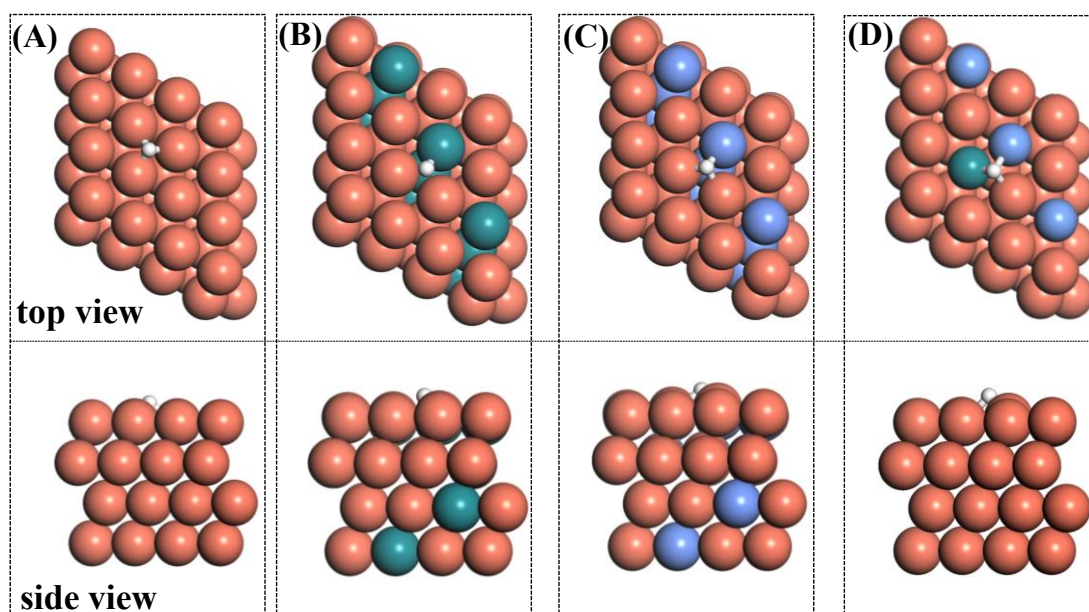

**Figure S12.** The configurations for \*H on (a) Cu (111), (b) CuRu (111), (c) CuMo (111) and (d) CuMoRu (111) (top view and side view). The brick red, green, blue, grey, red and white balls represent Cu, Ru, Mo, C, O and H, respectively.

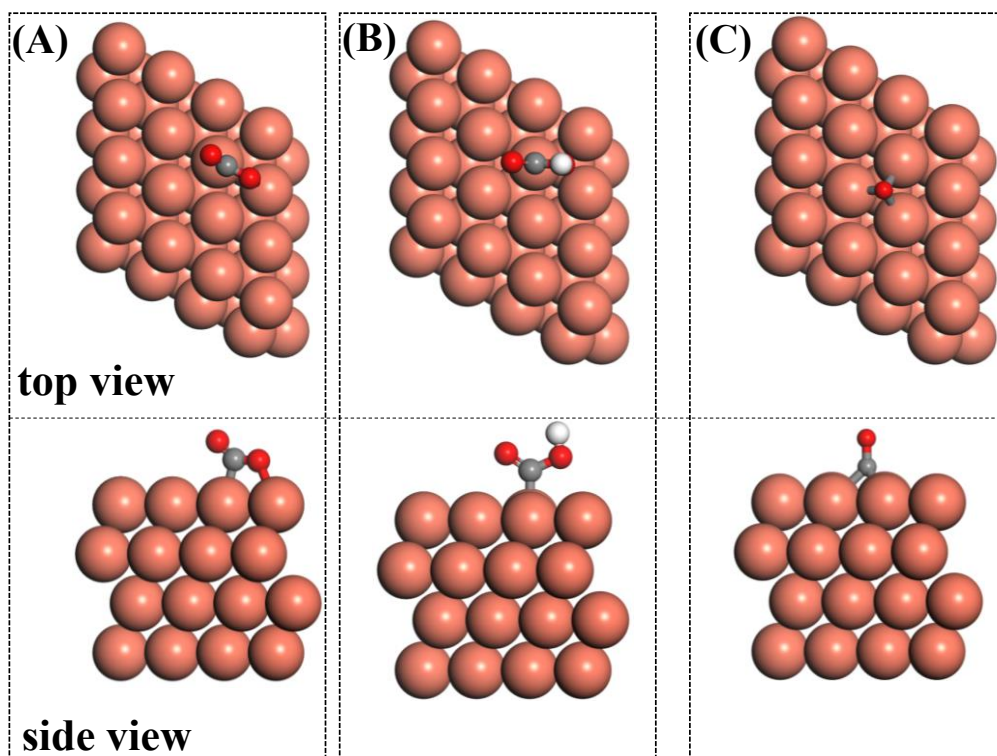

**Figure S13.** The configurations for (a)  $\text{CO}_2$ , (b)  $\text{COOH}$  and (c)  $\text{CO}$  on Cu (111) (top row: top view; bottom row: side view). The grey, red and white balls represent C, O and H, respectively.

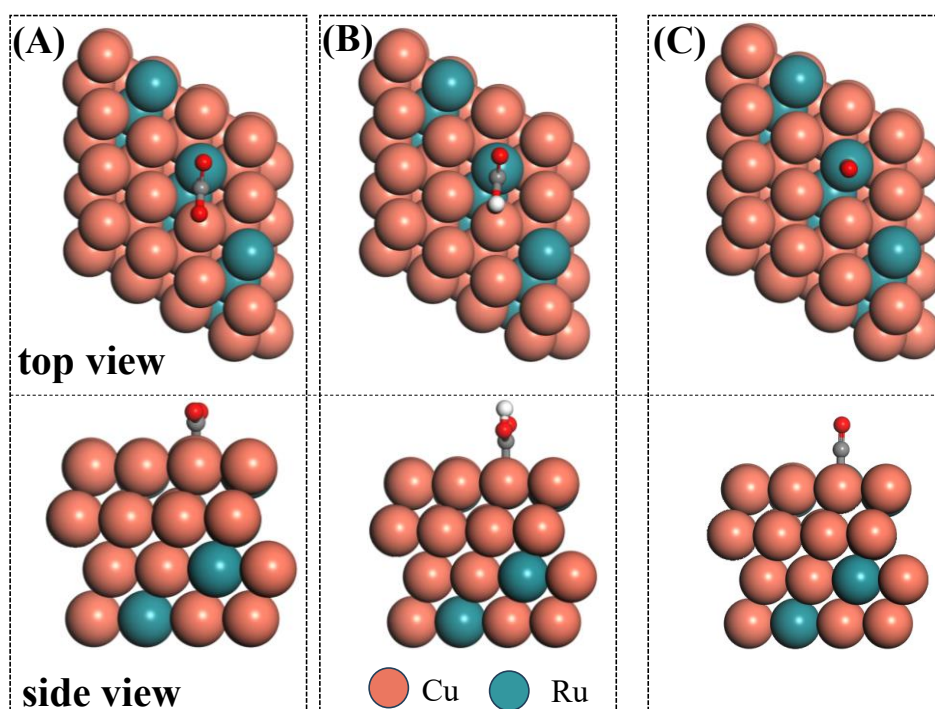

**Figure S14.** The configurations for (A)  $^*CO_2$  (B)  $^*COOH$  and (C)  $^*CO$  on CuRu (111) (top row: top view; bottom row: side view). The grey, red and white balls represent C, O and H, respectively.

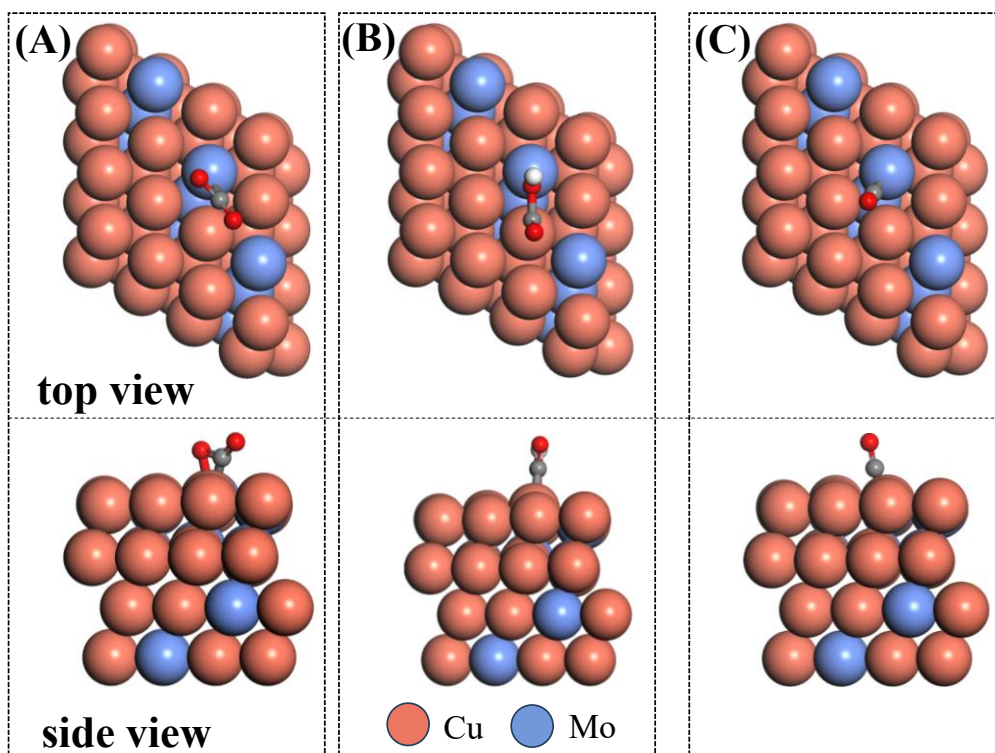

**Figure S15.** The configurations for (a)  $^*CO_2$ , (b)  $^*COOH$  and (c)  $^*CO$  on CuMo (111) (top row: top view; bottom row: side view). The grey, red and white balls represent C, O and H, respectively.

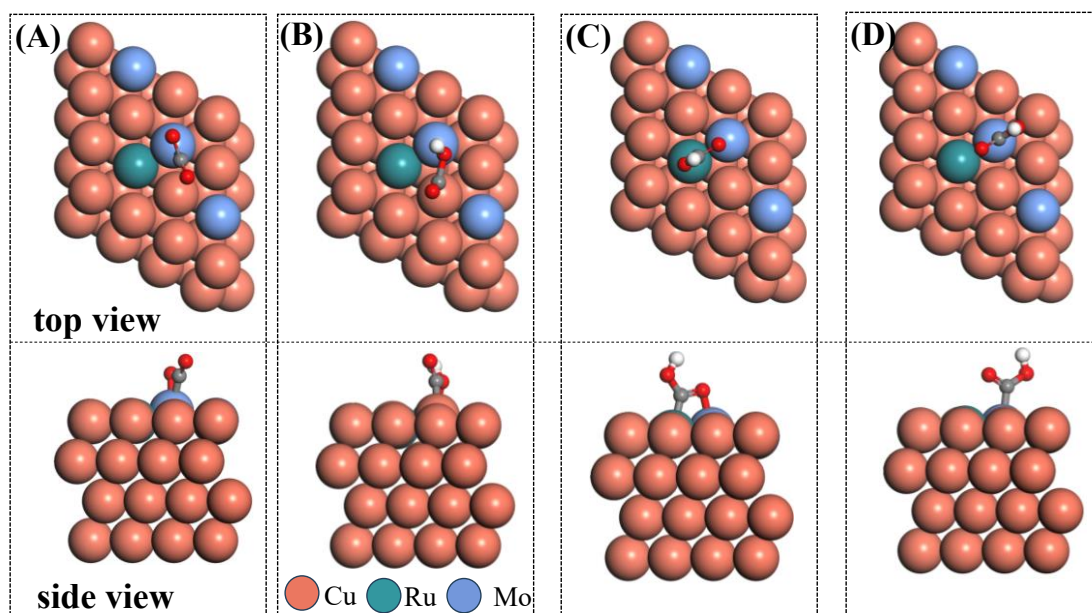

**Figure S16.** The configurations for (a)  $^*CO_2$ , and  $^*COOH$  on (b) Mo site (c) Cu site and (d) Ru site of CuMoRu (111) (top row: top view; bottom row: side view). The grey, red and white balls represent Cu, Ru, Mo, C, O and H, respectively.

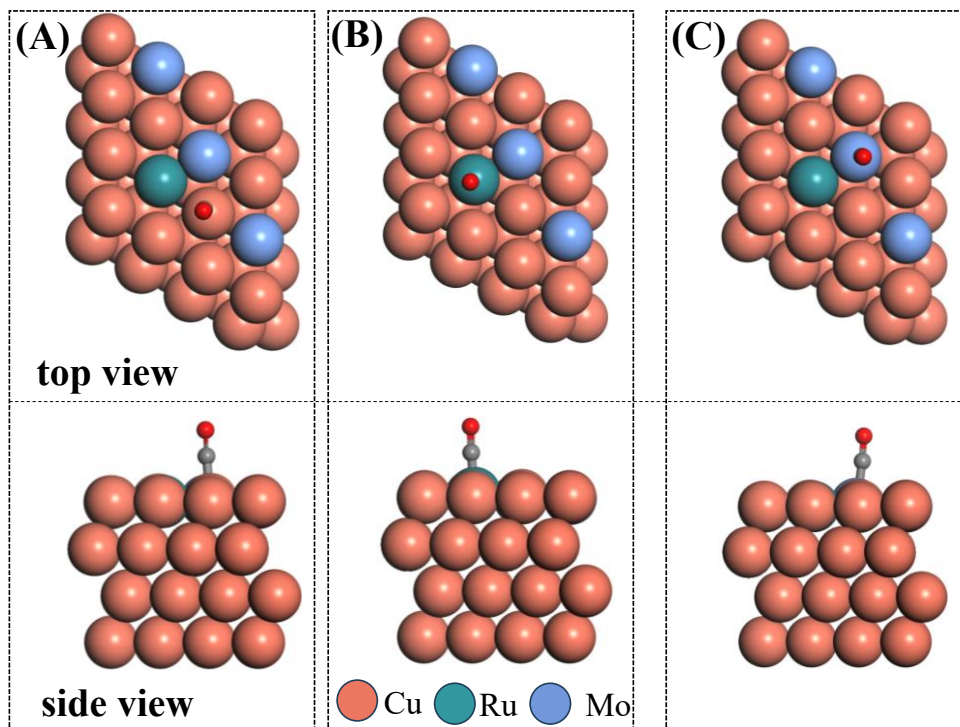

**Figure S17.** (a) The configurations of  $*CO$  on (a) Cu site, (b) Mo site and (c) Ru site on CuMoRu (111) (top row: top view; bottom row: side view). The brick red, green, blue, grey, red and white balls represent Cu, Ru, Mo, C, O and H, respectively.

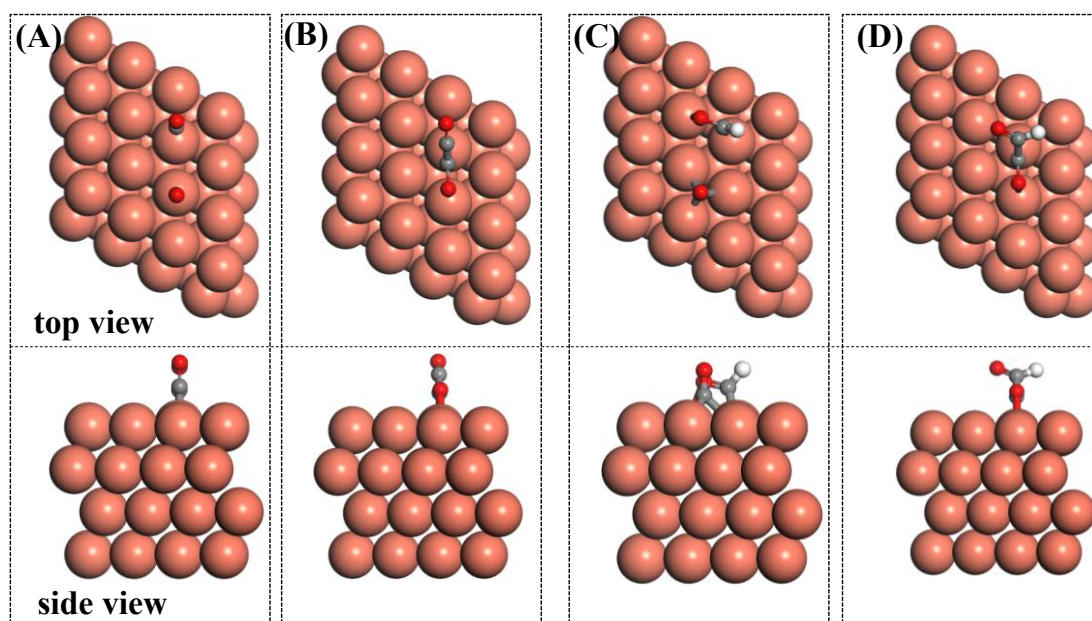

**Figure S18.** The configurations for dimerization of (A) 2\*CO and (B) \*OCCO on Cu (111). The configurations for dimerization of (C) \*CO and \*CHO (D) COCHO on Cu (111) (top row: top view; bottom row: side view). The brick red, grey, red and white balls represent Cu, C, O and H, respectively.

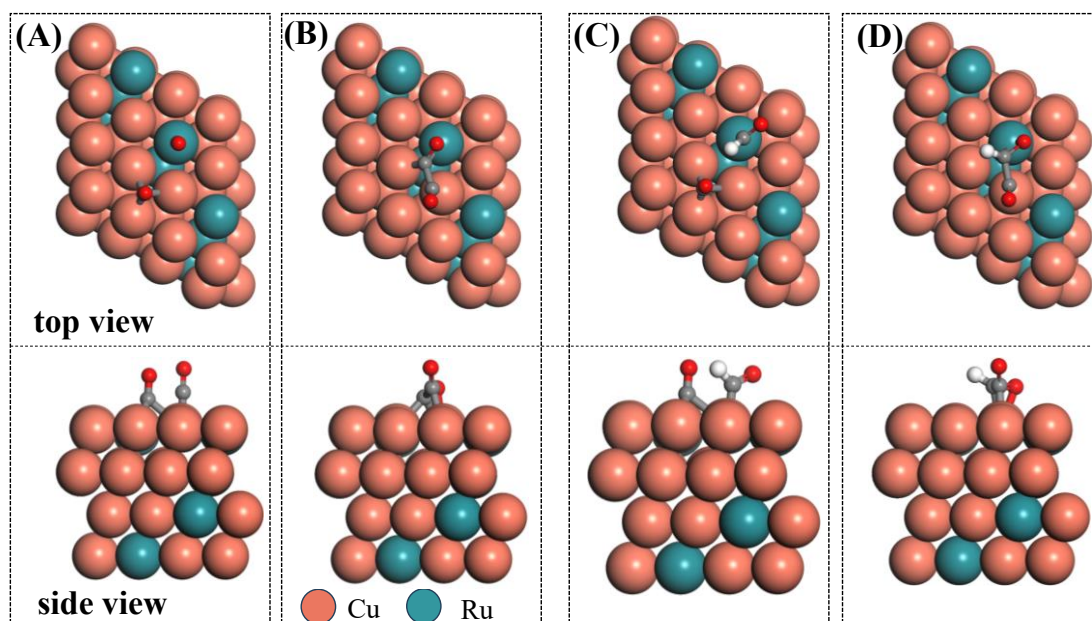

**Figure S19.** The configurations for dimerization of (A) 2\*CO and (B) \*OCCO on Cu Ru (111). The configurations for dimerization of (C) \*CO and \*CHO and (D) COCHO on CuRu (111) (top view and side view). The brick red, green, grey, red and white balls represent Cu, Ru, C, O and H, respectively.

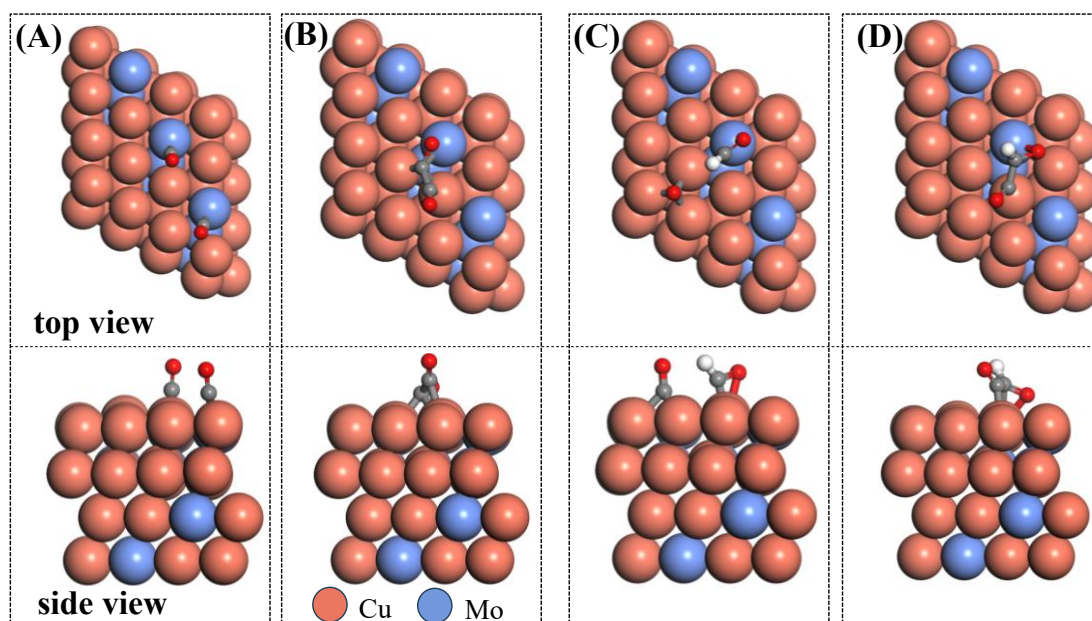

**Figure S20.** The configurations for dimerization of (A) 2\*CO and (B) \*OCCO on CuMo (111). The configurations for dimerization of (C) \*CO and \*CHO and (D) COCHO on CuMo (111) (top view and side view). The brick red, blue, grey, red and white balls represent Cu, Mo, C, O and H, respectively.

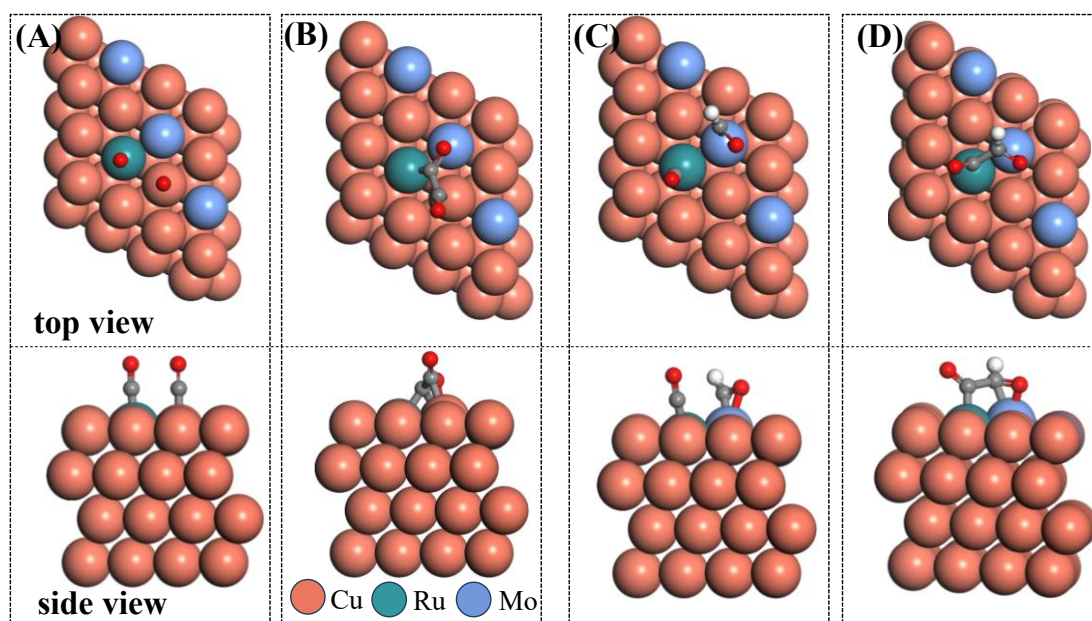

**Figure S21.** The configurations for dimerization of  $2^*CO$  and  $^*OCCO$  on (a-b) MoRu-Cu (111). The configurations for dimerization of  $^*CO$  and  $^*CHO$  (c-d) and (D) COCHO MoRu-Cu (111) (top view and side view). The brick red, green, blue, grey, red and white balls represent Cu, Ru, Mo, C, O and H, respectively.

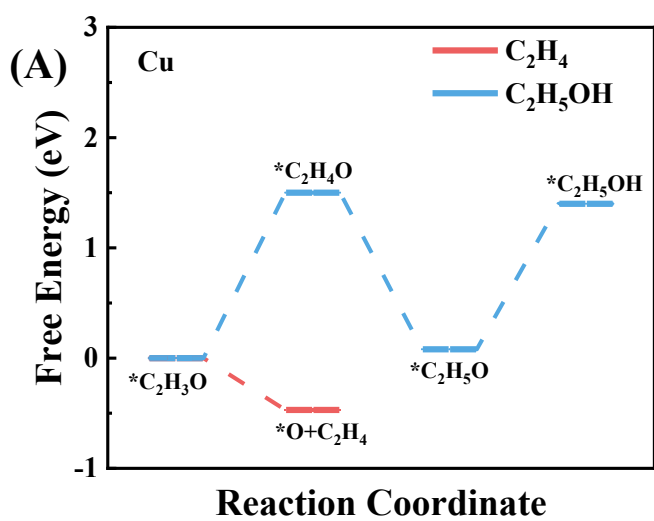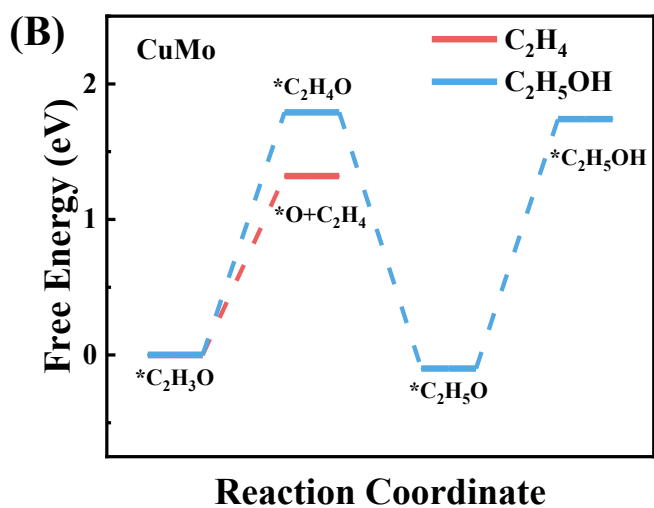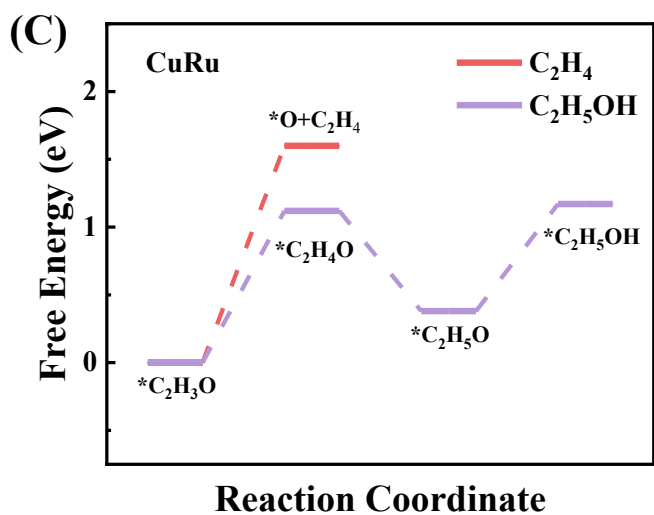

**Figure S22.** Gibbs free energy diagram to  $\text{C}_2\text{H}_4$  (red) and  $\text{C}_2\text{H}_5\text{OH}$  (blue) on (A) CuMo (111) and (B) CuRu (111).

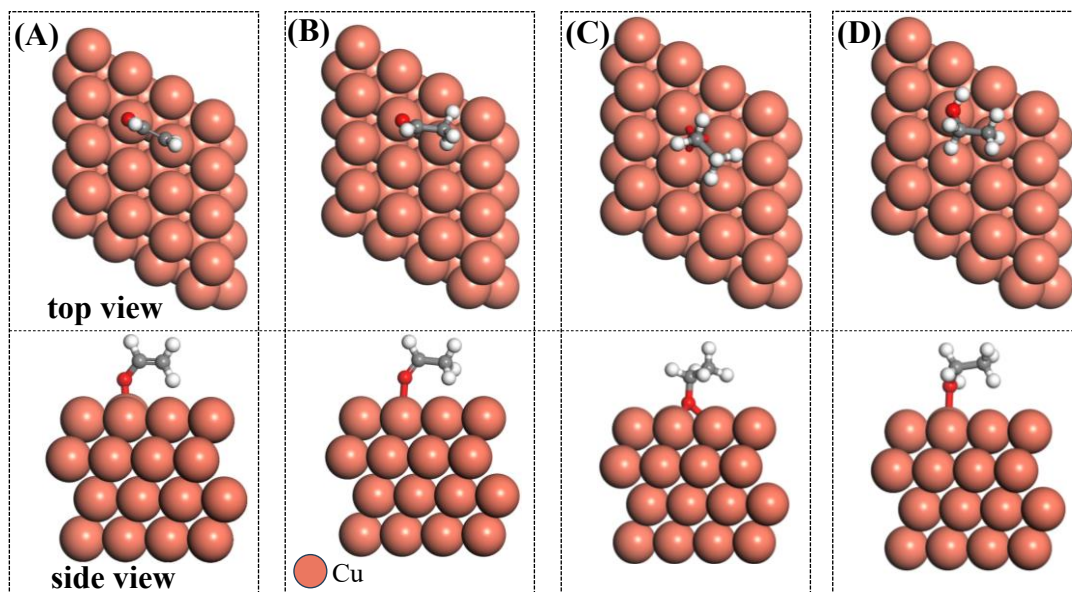

**Figure S23.** The configurations for (A)  $^*\text{CH}_2\text{CHO}$ , (B)  $^*\text{CH}_3\text{CHO}$ , (C)  $^*\text{CH}_3\text{CH}_2\text{O}$  and (d)  $^*\text{CH}_3\text{CH}_2\text{OH}$  during  $\text{eCO}_2\text{RR}$  to  $\text{C}_2\text{H}_5\text{OH}$  on Cu (111) (top row: top view; bottom row: side view). The balls represent Cu, C, O and H, respectively.

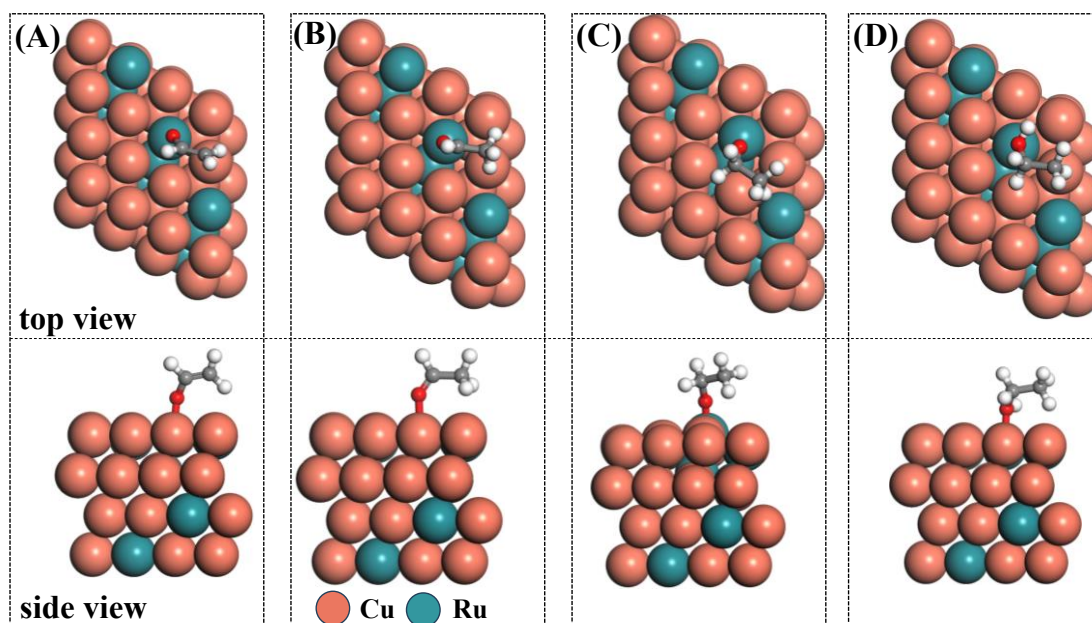

**Figure S24.** The configurations for (A)  $^*\text{CH}_2\text{CHO}$ , (B)  $^*\text{CH}_3\text{CHO}$ , (C)  $^*\text{CH}_3\text{CH}_2\text{O}$  and (d)  $^*\text{CH}_3\text{CH}_2\text{OH}$  during  $\text{eCO}_2\text{RR}$  to  $\text{C}_2\text{H}_5\text{OH}$  on CuRu (111) (Top row: top view; Bottom row: side view). The grey, red and white balls represent C, O and H, respectively.

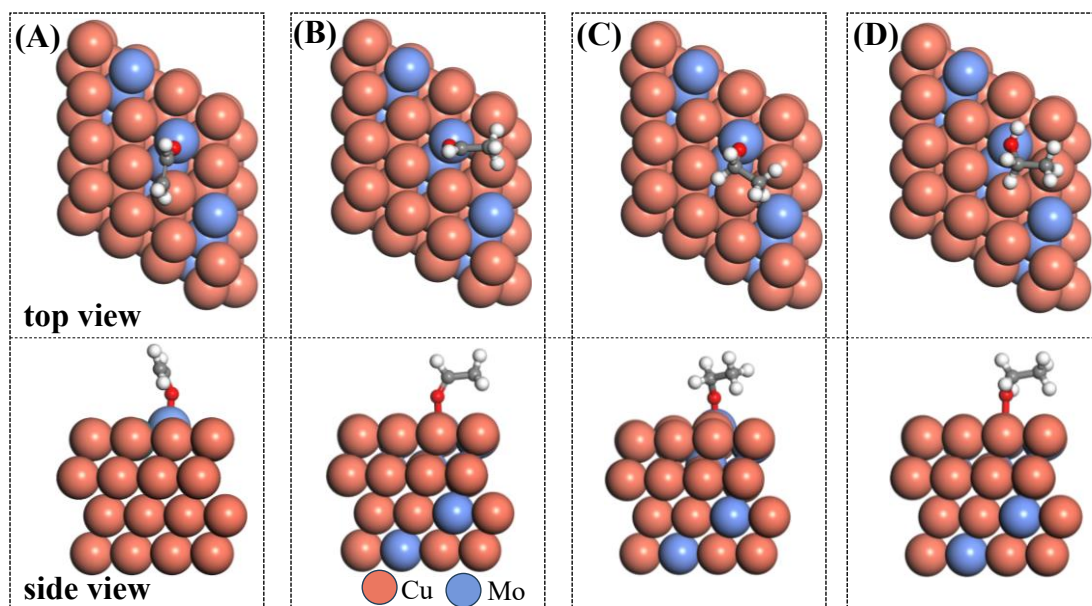

**Figure S25.** The configurations for (A)  $^*\text{CH}_2\text{CHO}$ , (B)  $^*\text{CH}_3\text{CHO}$ , (C)  $^*\text{CH}_3\text{CH}_2\text{O}$  and (D)  $^*\text{CH}_3\text{CH}_2\text{OH}$  during eCO<sub>2</sub>RR to C<sub>2</sub>H<sub>5</sub>OH on CuMo (111) (Top row: top view; Bottom row: side view). The grey, red and white balls represent C, O and H, respectively.

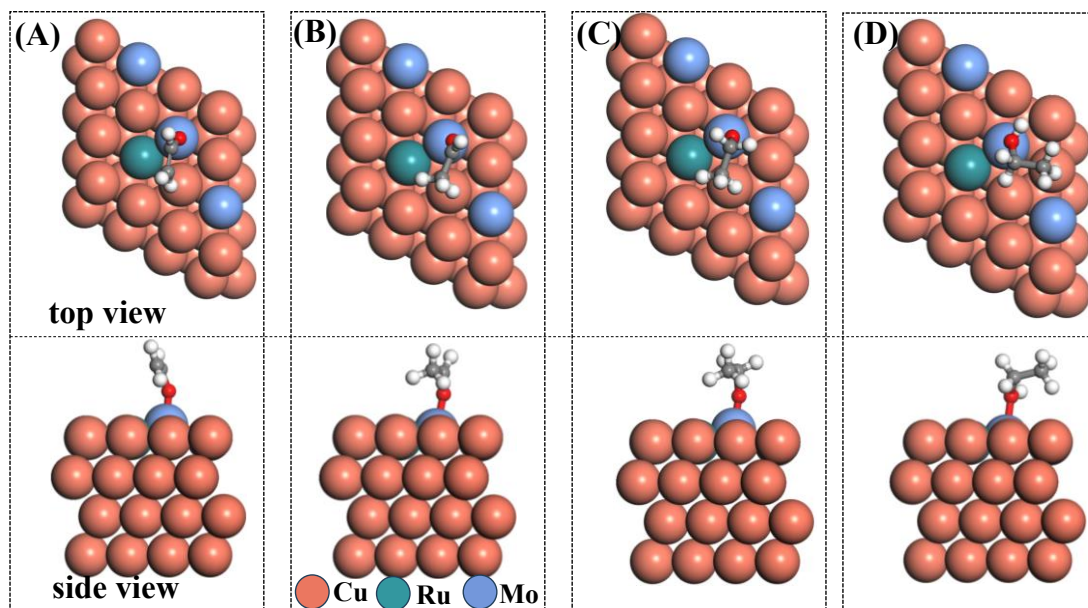

**Figure S26.** The configurations for (A)  $^*CH_2CHO$ , (B)  $^*CH_3CHO$ , (C)  $^*CH_3CH_2O$  and (D)  $^*CH_3CH_2OH$  during eCO<sub>2</sub>RR to C<sub>2</sub>H<sub>5</sub>OH on CuMoRu (111) (Top row: top view; Bottom row: side view). The brick grey, red and white balls represent, C, O and H, respectively.

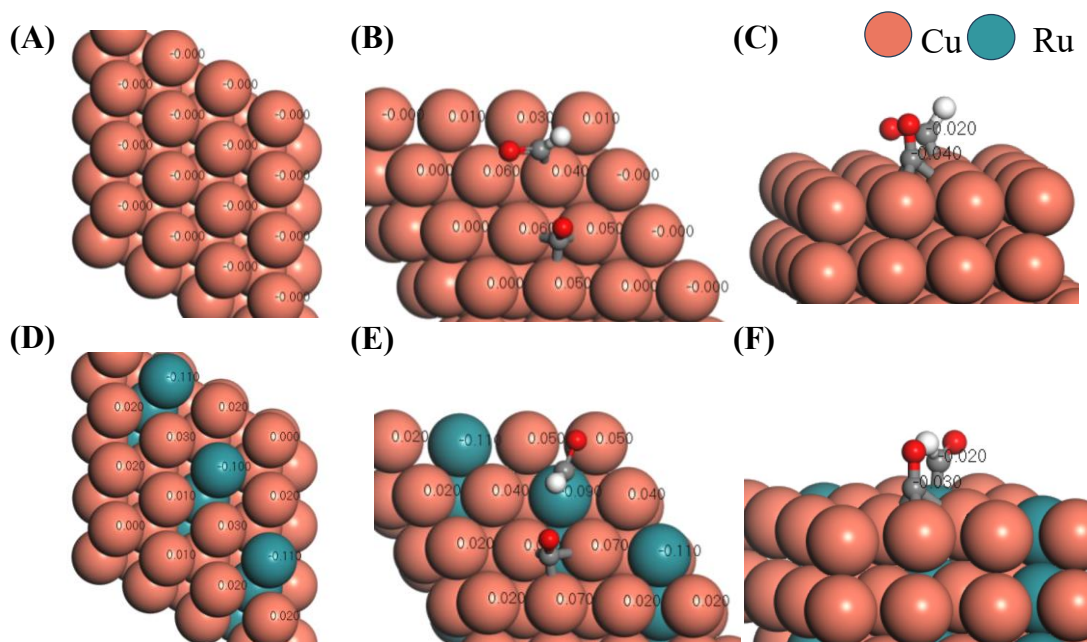

**Figure S27.** Bader charge of (A) Cu (111); (B) top view of Cu (111) with adsorbed CO and CHO; (C) side view of Cu (111) with CO and CHO; Bader charge of (D) CuRu (111), (E) top view of CuRu (111) with adsorbed CO and CHO; (F) side view of CuRu (111) with CO and CHO.

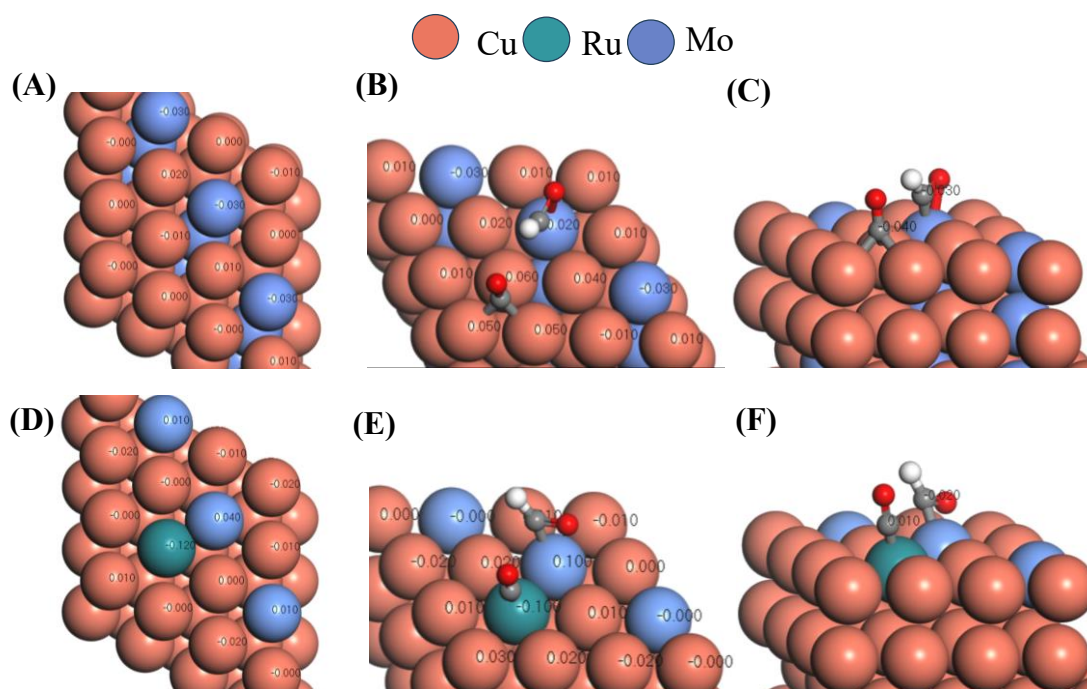

**Figure S28.** Bader charge of (A) CuMo (111); (B) top view of CuMo (111) with adsorbed CO and CHO; (C) side view of CuMo (111) with CO and CHO; Bader charge of (D) CuMoRu (111), (E) top view of CuMoRu (111) with adsorbed CO and CHO; (F) side view of CuMoRu (111) with CO and CHO.

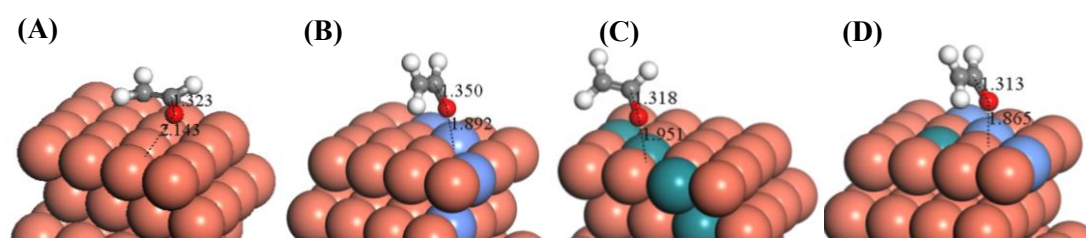

**Figure S29.** Schematic illustration of key intermediate  $*\text{C}_2\text{H}_3\text{O}$  on (a) Cu (111), (b) CuMo (111), CuRu (111) and CuMoRu (111). The grey, red and white balls represent C, O and H, respectively.

**Table S1.** Atomic Fraction (%) of metal elements in CuMoRu determined by EDS spectrum and atomic ICP-AES.

| Element | Atomic Fraction (%) by EDS | Atomic Fraction (%) by ICP-AES |
|---------|----------------------------|--------------------------------|
| Cu      | 95.61                      | 94.11                          |
| Mo      | 3.99                       | 4.86                           |
| Ru      | 0.40                       | 1.03                           |

**Table S2.** Atomic percentage of metal components in CuMo, CuMoRu and CuMoRu-X (X=1, 2, 3 and 5) samples determined by XPS high-resolution spectra.

| %        | Cu   | Mo   | Ru   |
|----------|------|------|------|
| CuMo     | 74.9 | 25.1 | -    |
| CuMoRu-5 | 53.3 | 33.8 | 12.9 |
| CuMoRu   | 59.4 | 28.7 | 11.9 |
| CuMoRu-3 | 61.7 | 14.4 | 23.8 |
| CuMoRu-2 | 50.4 | 18.4 | 31.3 |
| CuMoRu-1 | 54.4 | 12.8 | 32.7 |

**Table S3.** Comparison of FE and partial current density for ethanol production in eCO<sub>2</sub>RR of CuMoRu in this study with previous reported binary alloy and any other catalysts.

| Catalysts                             | FE (%)      | J (mA cm <sup>-2</sup> ) | electrolyte        | stability        | Reference        |
|---------------------------------------|-------------|--------------------------|--------------------|------------------|------------------|
| <b>CuMoRu</b>                         | <b>51.8</b> | <b>182.7</b>             | <b>KOH</b>         | <b>over 10 h</b> | <b>This work</b> |
| P-Cu                                  | 18.0        | 49.5                     | KOH                | 12 h             | 1                |
| PAMV-Cu                               | 57.3        | 51.4                     | CsHCO <sub>3</sub> | 20 h             | 2                |
| Cu <sub>2</sub> S-Cu-V                | 25.0        | 100.0                    | KOH                | -                | 3                |
| Pb-Cu                                 | 50          | 131                      | KOH                | 200 h            | 4                |
| Cu <sub>2</sub> O@Cu <sub>2</sub> S   | 43.9        | 70.2                     | KHCO <sub>3</sub>  | 24 h             | 5                |
| Ag <sub>1</sub> Cu NW                 | 56.3        | 97.3                     | KOH                | 7 h              | 6                |
| F-Cu <sub>2</sub> O                   | 55.2        | 166                      | KOH                | 60 h             | 7                |
| CuAl <sub>2</sub> O <sub>4</sub> /CuO | 41.0        | 82.0                     | KOH                | 150 h            | 8                |
| Cu+COP <sub>CO+OH</sub>               | 54.2        | 121.3                    | KHCO <sub>3</sub>  | 100 h            | 9                |

**Table S4.** The EIS fitted equivalent circuit parameters from EIS and ECSA ( $\text{cm}^{-2}$ ) of CuMo, CuMoRu and CuMoRu-X (X=1, 2, 3 and 5) samples.

| <i>Samples</i> | $R_{ct} / \Omega$ | $W-R$<br>$/\Omega \cdot \text{cm}^2 \cdot \text{s}^{-1/2}$ | $W-T$<br>$m\Omega \cdot \text{cm}^2 \cdot \text{s}^{-1/2}$ | $W-P$<br>$\Omega \cdot \text{cm}^2 \cdot \text{s}^{-1/2}$ | ECSA<br>$\text{cm}^{-2}$ |
|----------------|-------------------|------------------------------------------------------------|------------------------------------------------------------|-----------------------------------------------------------|--------------------------|
| CuMo           | 7.71              | 10.52                                                      | 2.4                                                        | 0.50                                                      | 0.92                     |
| CuMoRu-5       | 7.80              | 8.90                                                       | 5.7                                                        | 0.51                                                      | 0.93                     |
| CuMoRu         | 7.36              | 6.16                                                       | 5.5                                                        | 0.51                                                      | 1.12                     |
| CuMoRu-3       | 7.75              | 7.49                                                       | 3.9                                                        | 0.49                                                      | 1.12                     |
| CuMoRu-2       | 7.77              | 7.99                                                       | 7.5                                                        | 0.46                                                      | 1.13                     |
| CuMoRu-1       | 8.06              | 8.43                                                       | 7.6                                                        | 0.49                                                      | 1.13                     |

$R_{ct}$ : Interfacial charge transfer resistance. W-R represents the diffusion coefficient and measure of how quickly the species can diffuse to the electrode surface. W-T is defined as  $L^2/D$ , where L is the thickness of the diffusion layer and D is the diffusion coefficient. W-P is a dimensionless parameter, which is typically 0.5 for Warburg diffusion, indicating the power-law relationship between impedance and frequency. It reflects the characteristic  $45^\circ$  phase angle observed in the Nyquist plot for Warburg impedance. The deviation from 0.5 might be accounted for the roughness or porosity of the electrode layers.

## Reference

1. X. Kong, C. Wang, H. Zheng, Z. Geng, J. Bao and J. Zeng, *Science China Chemistry*, 2021, 64, 1096-1102.
2. W. Yuan, Z. Zhao, G. Tao, L. He, Y. Wang, Q. Qian, J. Zhang, L. Jing, J. Ma, Y. Yuan, B. Guan, X. Sun and B. Han, *Journal of the American Chemical Society*, 2026, DOI: 10.1021/jacs.5c20004.
3. T.-T. Zhuang, Z.-Q. Liang, A. Seifitokaldani, Y. Li, P. De Luna, T. Burdyny, F. Che, F. Meng, Y. Min, R. Quintero-Bermudez, C. T. Dinh, Y. Pang, M. Zhong, B. Zhang, J. Li, P.-N. Chen, X.-L. Zheng, H. Liang, W.-N. Ge, B.-J. Ye, D. Sinton, S.-H. Yu and E. H. Sargent, *Nature Catalysis*, 2018, 1, 421-428.
4. P. Liu, N. Sun, J. Su, Y. Wang, Z. Peng, S. Chen, P. Papangelakis, A. Ozden, R. K. Miao, X. Wang, Y. Xu, J. Zeng, H. Wang, H. Liu, Y. Zhao, S. Shi, M. Shakouri, H. Liang, Z. Wang, H. Zhang, Y. Hu, Z. Yao, D. Sinton and J. Li, *Nature Synthesis*, 2025, DOI: 10.1038/s44160-025-00868-7.
5. J. Li, R. Cai, H. Mu, J. Guo, X. Zhong, J. Wang, X. Du, J. Zhang and F. Li, *ACS Catalysis*, 2024, 14, 3266-3277.
6. S. Wang, F. Li, J. Zhao, Y. Zeng, Y. Li, Z.-Y. Lin, T.-J. Lee, S. Liu, X. Ren, W. Wang, Y. Chen, S.-F. Hung, Y.-R. Lu, Y. Cui, X. Yang, X. Li, Y. Huang and B. Liu, *Nature Communications*, 2024, 15, 10247.
7. J. Zhou, B. He, P. Huang, D. Wang, Z. Zhuang, J. Xu, C. Pan, Y. Dong, D. Wang, Y. Wang, H. Huang, J. Zhang and Y. Zhu, *Angewandte Chemie International Edition*, 2025, 64, e202418459.
8. T. Zhang, B. Yuan, W. Wang, J. He and X. Xiang, *Angewandte Chemie International Edition*, 2023, 62, e202302096.
9. P. Huang, Z. Yang, K. Zhai, B. Huang, J. Zhou, X. Sun, Y. Lin, J. Xu, C. Pan, Y. Dong, Y. Wang, Y. Zhang, Y. Lou, H. Huang, Y. Zhu and J. Zhang, *Journal of the American Chemical Society*, 2025, 147, 22062-22071.
